1     **Aerobic bacteria as *Escherichia coli* can survive in ESwab™ medium after a 3 month-**  
2                                   **freezing at -80°C but not after multiple thawing**

3

4     Rindala Saliba<sup>1</sup>, Jean Ralph Zahar<sup>1,2</sup>, Etienne Carbonnelle<sup>1,2</sup> and Mathilde Lescat<sup>1,2,\*</sup>

5     <sup>1</sup>APHP, Hôpitaux Universitaires de Paris Seine Saint-Denis, Bondy, France

6     <sup>3</sup> Université Paris 13, Université Paris Diderot, INSERM, IAME, UMR 1137, Sorbonne Paris  
7     Cité, Paris, Paris, France

8

9     **Running title:** bacteria viability ESwab™

10    **Keywords:** *Escherichia coli*, aerobic bacteria, ESwab™, freezing thawing, survival, impact  
11    for strain collection

12    \* Corresponding author

13

14    **Abstract**

15            Pretesting of procedures for specimen conservation should be part of preliminary  
16    studies for trials especially when quantification of bacteria must be performed in a second  
17    time. Quantitative epidemiological studies of multidrug resistant organisms sampled from  
18    rectal swabs could be then particularly favored. The aim of this preliminary study, was to  
19    evaluate the performance of the flocked swab with liquefied Amies transport medium  
20    ESwab™, for the survival evaluation of aerobic bacteria, from rectal swab sampling

21 according to the number of freezing at -80°C and thawing cycles and the time of freezing. We  
22 first observed that quantification was not reliable after F/T cycles whereas a unique freezing  
23 could be performed especially when studying *E. coli* isolates. The second experiment allowed  
24 us to observe that this stability could be obtained until 3 month-freezing. Our study represents  
25 a preliminary study, confirming the utility of ESwab™ in microbiological diagnostics and  
26 research studies, not only for molecular bacterial tests, but also, for the maintenance of  
27 bacterial viability in clinical specimens.

## 28 **Introduction:**

29 Understand the bases of emergence of multidrug resistant organisms (MDRO) has  
30 become an important and real challenge those last decades. *Enterobacteriaceae* are the most  
31 frequent MDRO spreading worldwide and are usually carried by patients in microbiota before  
32 being involved in pathologies (and isolated in clinical samples). Among this group,  
33 *Escherichia coli* can be considered as one of the most important because it is the most  
34 performant human gut commensal and become, depending on factors related to the host or the  
35 strain, a formidable pathogen (1). Besides, nowadays extended  $\beta$ lactamase (ESBL) producing  
36 isolates belong mainly to this species in both hospitals and community and constitute a major  
37 public health concern worldwide (2). Moreover, a high relative abundance of ESBL *E. coli*  
38 has been associated with longer fecal carriage time and a higher risk of infection (3). Many *in*  
39 *vivo* and *in vitro* studies try to identify the basis of commensalism which is natural the  
40 behavior of *E. coli* isolates whether it is resistant or not (4). The other MDRO belong mainly  
41 to the ESKAPE group (*Enterococcus faecium*, *Staphylococcus aureus*, *Klebsiella*  
42 *pneumoniae*, *Acinetobacter baumannii*, *Pseudomonas aeruginosa*, and *Enterobacter* species)  
43 (5). Likewise, those species are also opportunistic pathogens and quantitative studies of the  
44 prevalence, bacterial load and diversity of these species as well as *E. coli* in their natural

45 environment, which is the digestive gut, are essential (3, 6, 7).

46           Several steps in the analyses of bacteria from digestive gut are crucials and are directly  
47 related to a good diagnostic performance in the Clinical Microbiology laboratory. For  
48 example, in molecular methods, it is well known that DNA extraction or library preparation  
49 are key steps that could influence the quality of results. Besides, and whatever the method  
50 used (molecular or culturomics), it is essential that the sampling, transport and storage  
51 procedures do not alter the microbial composition (8). The best results are obtained when  
52 viability of micro-organisms is maintained, as well as, the relative proportions of all micro-  
53 organisms present in the clinical specimens and when liquid swab transport are used (9, 10).  
54 However, the studies evaluating the stability of the bacteria in those transport devices do not  
55 exceed days. The transport device, ESwab<sup>TM</sup> is the combination of a nylon-flocked swab with  
56 a transport maintenance medium, a modified liquid Amie's medium. ESwab<sup>TM</sup> is a swab  
57 systeme presenting advantages compared to other, including enhanced uptake and release of  
58 bacteria due the flocced nylon, the bacterial survival in the medium and an easy to use  
59 system. Swab specimens for bacterial investigations collected using ESwab<sup>TM</sup>, that can't  
60 immediately delivered to the laboratory, should be refrigerated at 4-8°C or stored at room  
61 temperature (20-25°C) and processed within 48 hours maximum of collection. According to  
62 the manufacturer, ESwab<sup>TM</sup> could be freezable at -20°C; however, after thawing, only  
63 molecular bacterial tests should be performed (13). Nowadays, numerous labs use ESwab<sup>TM</sup>  
64 system to sample the patients and evaluating this device in quantitative studies could be useful  
65 for hospitals in which patients are sample with it.

66           So far quantitative studies of *E. coli* in the feces have been performed using fresh feces  
67 or rectal swabs rapidly seeded or placed in Brain Heart infusion (BHI) with glycerol and  
68 placed at -80°C (3, 6, 7). In prospective studies, these procedures are time consuming and can

69 not be applied in numerous labs. Quantitative studies with other bacteria are very rare, based  
70 on total microbiota analyses or absent and these studies are needed (11, 12). To have the  
71 opportunity to freeze directly available devices could be useful in many labs and increase the  
72 feasibility of these experiments.

73         Pretesting of procedures for specimen collection, transport and conservation should be  
74 part of preliminary studies for trials. The aim of this preliminary study, was (i) to evaluate the  
75 survival of aerobic bacteria from rectal swab placed in the transport medium ESwab™  
76 according to the number of freezing at -80°C and thawing cycles (F/T cycles) and (ii) the  
77 survival of *E. coli* isolates from rectal swab placed in the transport medium ESwab™ during a  
78 long period (3 months).

## 79 **Materials and Methods:**

80         The survival of aerobic bacteria in the ESwab™ (Copen Diagnostics, Italy), devices  
81 was investigated by quantification of aerobic bacteria in two experimentations. Both  
82 experiments were realized using samples of clinical rectal ESwab™, chosen randomly, in the  
83 laboratory of Microbiology of Jean Verdier Hospital, Bondy, France. In the first  
84 experimentation, 9 samples were treated during a period of 3 weeks, by two methods A and B  
85 of F/T cycles for comparison after an initial quantification of each aerobic bacterium.

86         In the second experimentation 4 samples were treated during 3 months by the method  
87 B for comparison after an initial quantification of *E. coli* isolates.

88         In the method A, an aliquot of 400 µL of the initial medium suspension of the  
89 ESwab™ sample was stored at -80°C and defrosted and refreeze (F/T cycles) at each step (1  
90 week, 2 weeks and 3 weeks) In the method B, three aliquots of 100 µL each were frozen at -  
91 80°C and used for quantification at each step (1 week/month, 2 weeks/months and 3

92 weeks/months, according to the experimentation). Each aerobic bacterium quantification was  
93 performed using 100  $\mu$ L of the medium suspension contained in the ESwab<sup>TM</sup>. The  
94 suspension was first serially 10-fold-diluted. Then, a 100- $\mu$ L sample of each dilution was  
95 inoculated on an UriSelect4 plate (Bio-Rad, Marnes, la coquette, France) and spread over the  
96 entire surface using a sterile L-spatula. Plates were incubated for 18-24h at 37°C. The  
97 quantification of each aerobic bacterium was obtained by performing each aerobic bacteria  
98 colony count on three dilution plates. The relative quantification for each point was obtained  
99 by dividing the result of each aerobic bacterium quantification at each time (1 week/month, 2  
100 weeks/months and 3 weeks/months according to the experimentation) by the initial result of  
101 each aerobic bacterium quantification at time 0 (TO).

102 For all experiments a first study of one type of colony of bacteria was realized at TO  
103 allowing the identification at the species level using the Microflex bench-top Matrix Assisted  
104 Laser Desorption Ionisation-Time of Flight (MALDI-TOF) mass spectrometer (Brücker,  
105 Champs-sur-Marne, France). Then, we decided to interpret the identification of all other  
106 bacteria with the same size, colour and aspect of the colonies after a first identification by  
107 MALDI-TOF.

108 All statistics were computed performed using R software (R Development Core Team,  
109 2009, Vienna Austria) and statistical significance was determined at a p-value of less than  
110 0.05.

## 111 **Results**

112 In the first experiment, the survival of each aerobic bacterium in the ESwab<sup>TM</sup> devices  
113 was evaluated, by calculating a relative quantification ratio, based on each aerobic bacterium  
114 colony count, then, by determining the relative ratio using the two methods A and B. Among

115 the 9 samples, 6 were positive for *E. coli* detection, two for *K. pneumonia* and 8 for  
116 *Enterococcus species* at TO. When detected all aerobic bacterium quantification were  
117 comprised between  $2.0 \cdot 10^4$  and  $1.5 \cdot 10^7$  colony forming unit (CFU)/mL of ESwab™ liquid  
118 (Table1). When we observed aerobic bacterium relative quantification across the time,  
119 variations were observed between the two methods and the different bacteria. The relative  
120 quantification of both *Enterobacteriaceae* across the time was similar with a drastic decreased  
121 quantification (no significant difference using t-test) when samples were subjected to F/T  
122 cycles (method A). On the contrary, in the method B, quantifications remained stable for both  
123 *Enterobacteriaceae* with a significant higher resistance of *E. coli* without inactivation (ratio=  
124 1 all along the experiment) whereas *K. pneumonia* quantifications were recovered at 60% (p=  
125  $5.7 \cdot 10^{-5}$ ). *Enterococcus species* remained stable at a relative quantification at 80% when  
126 aliquoted at the beginning and slightly decreased at 40% when freezed and defreezed. When  
127 we compared *E. coli* and *Enterococcus species* inactivations, we observed that *E. coli* were  
128 more resistant to long freezing states without thawing (method B), whereas *Enterococcus*  
129 *species* were more resistant to F/T cycles (method A) (p=0.02 and 0.04, respectively).

130 In the second experiment, we performed the freezing during three months of 4 other  
131 ESwab™ sample aliquots containing exclusively *E. coli* isolates to determine specifically for  
132 this species during a longer period if the stability could be observed. Indeed, we observed a  
133 complete stability of the quantification of *E. coli* isolates at a mean value of  $2 \cdot 10^6$  CFU/mL  
134 during the three months.

## 135 **Discussion and conclusion**

136 In this study, we evaluated the survival of aerobic bacteria from rectal ESwab™  
137 according F/T cycles and then the survival of *E. coli* isolates from rectal swab placed in the  
138 transport medium ESwab™ during a long period (3 months).

139 Our first results indicated that all aerobic bacterium initial quantification were  
140 comprised between  $2.0 \cdot 10^4$  and  $1.5 \cdot 10^7$  colony forming unit (CFU)/mL of ESwab<sup>TM</sup> liquid  
141 (Table1) which is decreased compared to 16S quantification analyses of aerobic bacteria  
142 comprised in the total microbiota obtained when stools are collected instead of rectal samples  
143 (14). This could be explained by the fact that this quantification was performed after a per mL  
144 preliminary dilution of the feces in the ESwab<sup>TM</sup> liquid. In fact these quantifications are  
145 consistant with *E. coli* quantification, (from the most frequent aerobe isolated from human  
146 feces) which is about  $10^8$  colony forming unit (CFU) per gram of feces (14). It was not  
147 possible to weight the feces retrieved on samples due to the fact that analyses were performed  
148 from patient samples. And this should be taken into account in quantification analyses.

149 Our findings suggest that the ESwab<sup>TM</sup>, is able to preserve the initial quantity of *E.*  
150 *coli* when aliquoted and frozen at  $-80^\circ\text{C}$  during minimum 3 months but F/T cycles altered  
151 significantly the initial amount of isolates. *Enterococcus species* isolates are retrieved after  
152 cycles of F/T whatever the number of cycles (maximum 3) but the stability is increased when  
153 aliquots are performed at the beginning (from 40% to 80%). We were not able to explain such  
154 discrepancies in bacteria families and only found the study of Gao *et al* who compared  
155 resistance of isolates of *E. coli* and *E. faecalis* freezed in sterile water in different  
156 temperatures. They also observed increased inactivation of all the isolates proportional to the  
157 number of F/T cycles with higher resistance of *E. faecalis*. They did not observe higher  
158 resistance of *E. coli*, but the freezing duration is not indicated in the material and method  
159 section and they used water as liquid of conservation (15).

160 The best way to obtain quality results for both molecular and culturomic methods is to  
161 use fresh feces from individuals as samples. This procedure can be easily performed when  
162 subject of a study are healthy individuals or laboratory animals. However, the collection of

163 feces when subjects of studies are patients can be more difficult to manage. The use of rectal  
164 swabs followed by freezing seems the preferential procedure in the context of the difficulty of  
165 managing patient in the units and the samples in the lab. In fact, adequate strategies are  
166 required to limit bias due to shifts in microbial communities during sampling and storage.  
167 Rectal swabs are relatively simple samples to collect and are easily transported to the  
168 laboratory (16). They are routinely used in clinical settings to detect enteropathogens and  
169 multidrug resistant *Enterobacteriaceae* by culture analysis. Knowing that some of them, like  
170 ESwab<sup>TM</sup>, are also suitable for molecular analysis, they might be used to study the fecal  
171 microbiota composition. Moreover, studies have shown that rectal swabs are an acceptable  
172 and practical proxy alternative to stool, for the collection of fecal specimens and microbiota  
173 analysis (8, 16, 17). In some cases the determination of relative density of aerobic bacteria is  
174 of particular interest in some specific clinical questions whether the study is a one point or  
175 longitudinal follow up. For example, fecal density of ESBL *E. coli* has been observed as an  
176 important risk factor in ESBL infection (3). Methodology of transport and conservation of  
177 fecal samples is then crucial before analysis as well as culture conditions (mainly media).

178         Although fecal swabs are often used in the clinical setting, because of being the most  
179 user friendly method to obtain fecal samples, to our best knowledge, this is the first study that  
180 investigates the effect of F/T cycles and long freezing on the viability of aerobic bacteria *as E.*  
181 *coli*, in the ESwab<sup>TM</sup>. Our study represents a preliminary study, confirming the utility of  
182 ESwab<sup>TM</sup> in microbiological diagnostics and research studies, not only for molecular bacterial  
183 tests, but also, for the maintenance of bacterial viability in clinical specimens allowing  
184 combined quantitative study of aerobic bacteria (*E. coli*) with total microbiota by molecular  
185 analyses. Optimal results are obtained when ESwab<sup>TM</sup> initial medium suspension is aliquoted  
186 and stored at -80°C. Then thawing of aliquots must be performed once for each. However due



187 to the limited number of samples observed and especially for *K. pneumoniae*, our study  
188 should be completed, on a larger scale, by testing more samples.

189 List of figures and Table:

190 Figure 1: Boxplots of the relative quantification of aerobic bacteria in 9 ESwab<sup>TM</sup> samples  
191 during the first evaluation of 3 weeks, stored in 2 different methods A and B. The relative  
192 quantification was calculated, by dividing each aerobic bacterium quantification by the initial  
193 aerobic bacterium quantification (at time 0). The symbols are indicated. In the boxplot figure,  
194 when a line replace a boxplot means that there is no variations in the results of ratio of the  
195 isolate from the species.

196 Table1: Initial quantification of aerobic bacteria in the 9 ESwab<sup>TM</sup> samples. The  
197 numbers correspond to the numbers of colony forming unit per mL of ESwab<sup>TM</sup> liquid.

198

199 Bibliographic references

- 200 1. Tenailon O, Skurnik D, Picard B, Denamur E. 2010. The population genetics of  
201 commensal *Escherichia coli*. *Nat Rev Microbiol* 8:207–217.
- 202 2. Woerther P-L, Burdet C, Chachaty E, Andremont A. 2013. Trends in human fecal  
203 carriage of extended-spectrum  $\beta$ -lactamases in the community: toward the globalization of  
204 CTX-M. *Clin Microbiol Rev* 26:744–758.
- 205 3. Ruppé E, Lixandru B, Cojocaru R, Büke C, Paramythiotou E, Angebault C, Visseaux  
206 C, Djuikoue I, Erdem E, Burduniuc O, El Mniai A, Marcel C, Perrier M, Kesteman T,  
207 Clermont O, Denamur E, Armand-Lefèvre L, Andremont A. 2013. Relative fecal abundance  
208 of extended-spectrum- $\beta$ -lactamase-producing *Escherichia coli* strains and their occurrence in  
209 urinary tract infections in women. *Antimicrob Agents Chemother* 57:4512–4517.
- 210 4. Lescat M, Launay A, Magnan M, Glodt J, Pintard C, Dion S, Ghalayini M, Denamur  
211 E, Tenailon O. Using long-term experimental evolution to uncover the patterns and  
212 determinants of molecular evolution of an *Escherichia coli* natural isolate, in the streptomycin  
213 treated mouse gut. *Submitt Mol Ecol*.
- 214 5. Boucher HW, Talbot GH, Bradley JS, Edwards JE, Gilbert D, Rice LB, Scheld M,  
215 Spellberg B, Bartlett J. 2009. Bad bugs, no drugs: no ESKAPE! An update from the  
216 Infectious Diseases Society of America. *Clin Infect Dis Off Publ Infect Dis Soc Am* 48:1–12.
- 217 6. de Lastours V, Chopin D, Jacquier H, d’Humières C, Burdet C, Chau F, Denamur E,  
218 Fantin B. 2016. Prospective Cohort Study of the Relative Abundance of Extended-Spectrum-  
219 Beta-Lactamase-Producing *Escherichia coli* in the Gut of Patients Admitted to Hospitals.  
220 *Antimicrob Agents Chemother* 60:6941–6944.
- 221 7. Yamamoto S, Tsukamoto T, Terai A, Kurazono H, Takeda Y, Yoshida O. 1997.  
222 Genetic evidence supporting the fecal-perineal-urethral hypothesis in cystitis caused by  
223 *Escherichia coli*. *J Urol* 157:1127–1129.
- 224 8. Tedjo DI, Jonkers DMAE, Savelkoul PH, Masclee AA, van Best N, Pierik MJ,  
225 Penders J. 2015. The effect of sampling and storage on the fecal microbiota composition in  
226 healthy and diseased subjects. *PloS One* 10:e0126685.
- 227 9. Nys S, Vijgen S, Magerman K, Cartuyvels R. 2010. Comparison of Copan eSwab with  
228 the Copan Venturi Transystem for the quantitative survival of *Escherichia coli*, *Streptococcus*  
229 *agalactiae* and *Candida albicans*. *Eur J Clin Microbiol Infect Dis Off Publ Eur Soc Clin*  
230 *Microbiol* 29:453–456.
- 231 10. Van Horn KG, Rankin I. 2007. Evaluation and comparison of two Stuart’s liquid swab  
232 transport systems tested by the CLSI M40 method. *Eur J Clin Microbiol Infect Dis Off Publ*  
233 *Eur Soc Clin Microbiol* 26:583–586.
- 234 11. Dautzenberg MJD, Haverkate MR, Bonten MJM, Bootsma MCJ. 2016. Epidemic

- 235 potential of *Escherichia coli* ST131 and *Klebsiella pneumoniae* ST258: a systematic review  
236 and meta-analysis. *BMJ Open* 6:e009971.
- 237 12. Shimasaki T, Seekatz A, Bassis C, Rhee Y, Yelin RD, Fogg L, Dangana T, Cisneros  
238 EC, Weinstein RA, Okamoto K, Lolans K, Schoeny M, Lin MY, Moore NM, Young VB,  
239 Hayden MK, Centers for Disease Control and Prevention Epicenters Program. 2018.  
240 Increased relative abundance of *Klebsiella pneumoniae* carbapenemase-producing *Klebsiella*  
241 *pneumoniae* within the gut microbiota is associated with risk of bloodstream infection in long-  
242 term acute care hospital patients. *Clin Infect Dis Off Publ Infect Dis Soc Am*.
- 243 13. Human RP, Jones GA. 2004. Evaluation of swab transport systems against a published  
244 standard. *J Clin Pathol* 57:762–763.
- 245 14. Arumugam M, Raes J, Pelletier E, Le Paslier D, Yamada T, Mende DR, Fernandes  
246 GR, Tap J, Bruls T, Batto J-M, Bertalan M, Borruel N, Casellas F, Fernandez L, Gautier L,  
247 Hansen T, Hattori M, Hayashi T, Kleerebezem M, Kurokawa K, Leclerc M, Levenez F,  
248 Manichanh C, Nielsen HB, Nielsen T, Pons N, Poulain J, Qin J, Sicheritz-Ponten T, Tims S,  
249 Torrents D, Ugarte E, Zoetendal EG, Wang J, Guarner F, Pedersen O, de Vos WM, Brunak S,  
250 Doré J, Weissenbach J, Ehrlich SD, Bork P. 2011. Enterotypes of the human gut microbiome.  
251 *Nature* 473:174–180.
- 252 15. Gao W, Leung K, Hawdon N. 2009. Freezing Inactivation of *Escherichia coli* and  
253 *Enterococcus faecalis* in Water: Response of Different Strains. *Water Environ Res* 81:824–  
254 830.
- 255 16. Bassis CM, Moore NM, Lolans K, Seekatz AM, Weinstein RA, Young VB, Hayden  
256 MK, CDC Prevention Epicenters Program. 2017. Comparison of stool versus rectal swab  
257 samples and storage conditions on bacterial community profiles. *BMC Microbiol* 17:78.
- 258 17. Song SJ, Amir A, Metcalf JL, Amato KR, Xu ZZ, Humphrey G, Knight R. 2016.  
259 Preservation Methods Differ in Fecal Microbiome Stability, Affecting Suitability for Field  
260 Studies. *mSystems* 1.

261

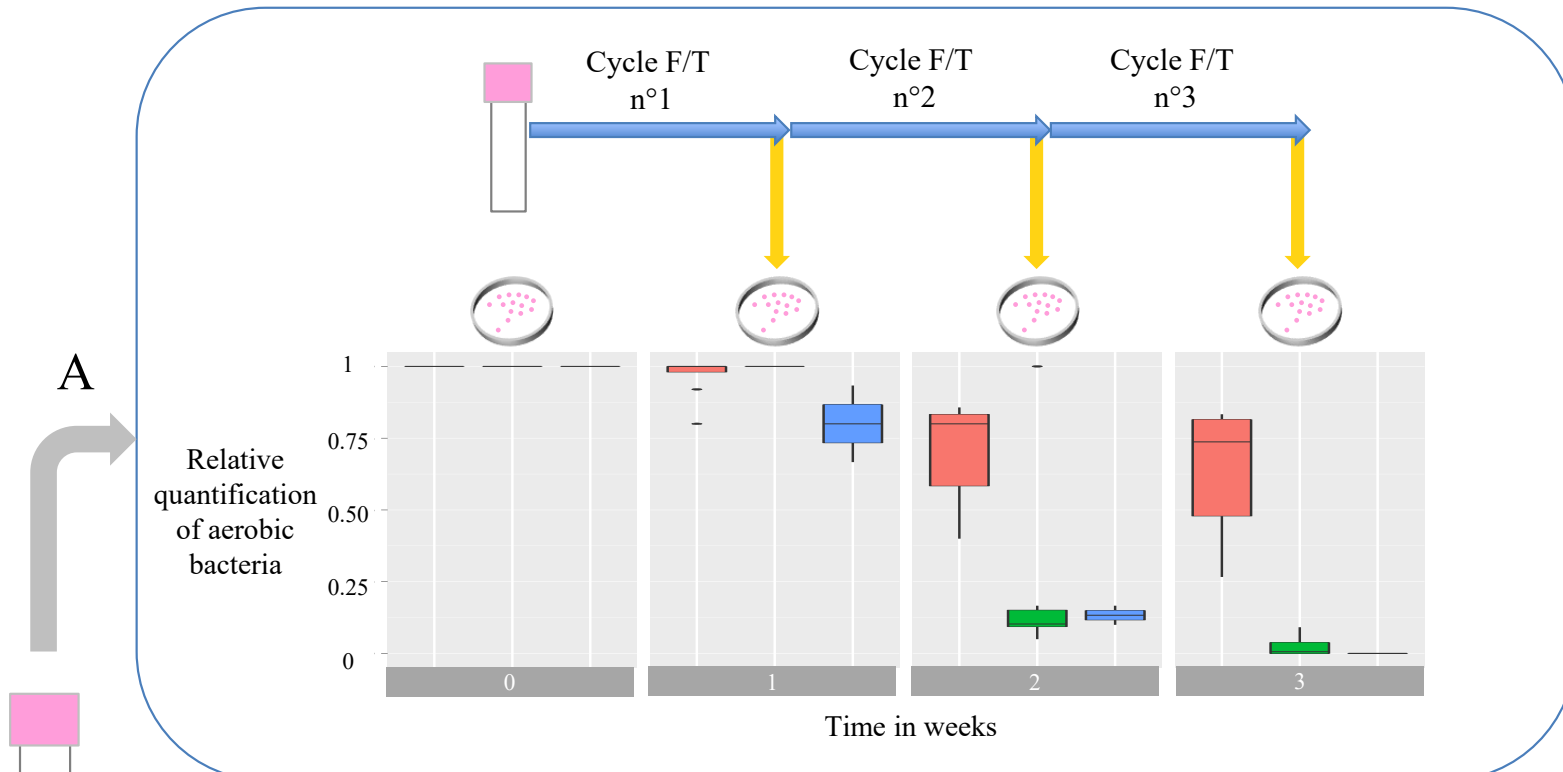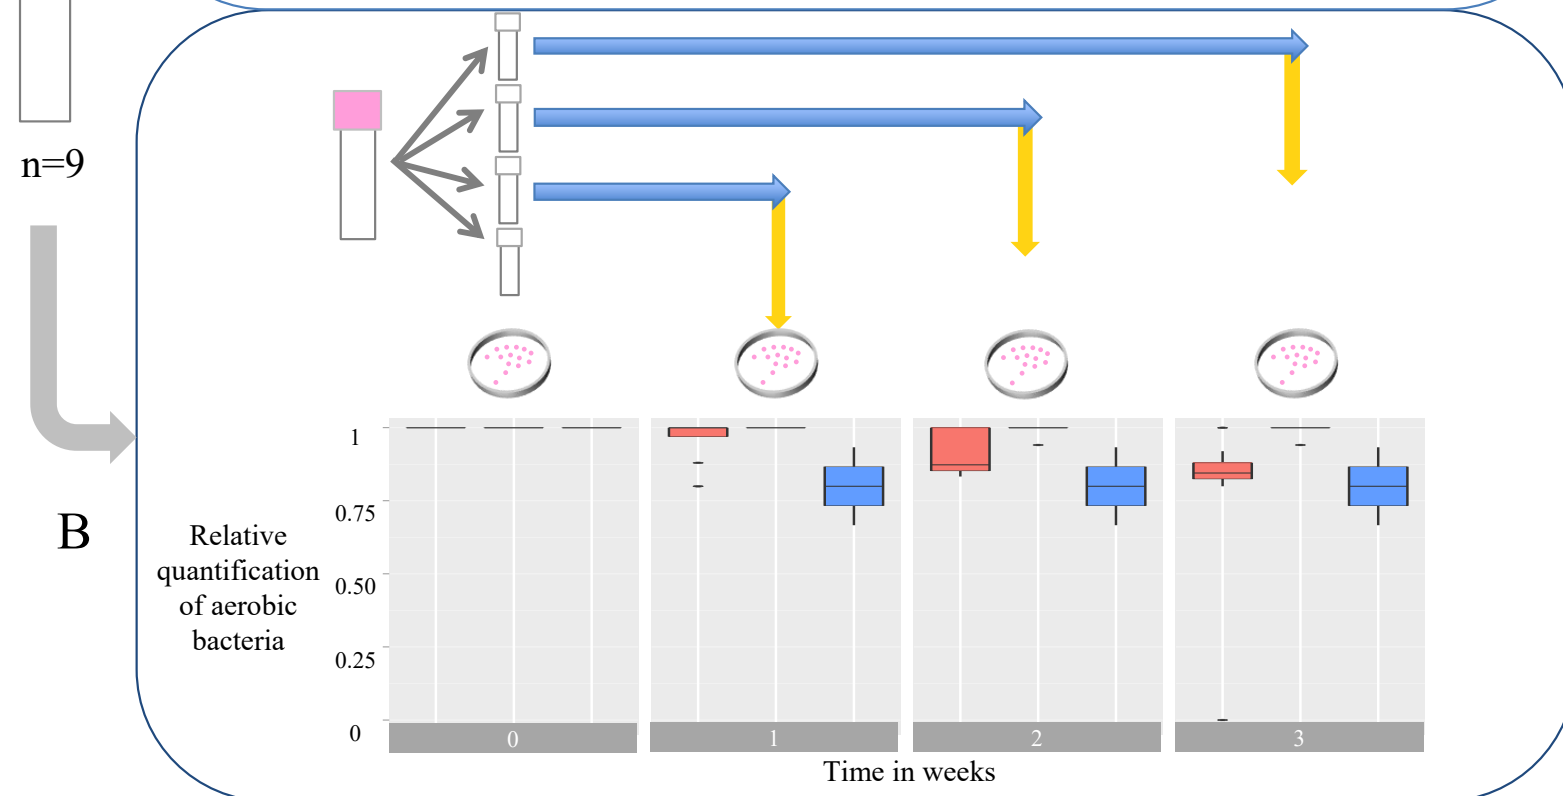

---

|                 | <i>E. coli</i>      | <i>K. pneumoniae</i> | <i>Enterococcus species</i> |
|-----------------|---------------------|----------------------|-----------------------------|
| <b>Sample 1</b> | 1.2 10 <sup>5</sup> | ND                   | 1.1 10 <sup>5</sup>         |
| <b>Sample 2</b> | 5.5 10 <sup>6</sup> | ND                   | 2.5 10 <sup>5</sup>         |
| <b>Sample 3</b> | 8.5 10 <sup>6</sup> | ND                   | 1.2 10 <sup>5</sup>         |
| <b>Sample 4</b> | 2.0 10 <sup>5</sup> | ND                   | 1.5 10 <sup>7</sup>         |
| <b>Sample 5</b> | ND                  | ND                   | 7.0 10 <sup>6</sup>         |
| <b>Sample 6</b> | ND                  | 7.5 10 <sup>6</sup>  | 2.0 10 <sup>4</sup>         |
| <b>Sample 7</b> | 2.0 10 <sup>5</sup> | ND                   | 2.5 10 <sup>6</sup>         |
| <b>Sample 8</b> | ND                  | 3.0 10 <sup>5</sup>  | 6.0 10 <sup>6</sup>         |
| <b>Sample 9</b> | 8.2 10 <sup>5</sup> | ND                   | ND                          |

---
